# Supplementary material for: GUESS-ing Polygenic Associations with Multiple Phenotypes Using a GPU-Based Evolutionary Stochastic Search Algorithm
Source: PubMed Central journal article supplement (PMC3738451; doi:10.1371/journal.pgen.1003657), 2013-08-08
Supplement: pgen.1003657.s014.pdf [file pgen.1003657.s014.pdf]

|             |              | Top<br>BMV<br>MPP | Top 5<br>BMV<br>Cum.<br>MPP | <i>SORT1</i> <sup>4</sup> /<br><i>CELSR2</i> <sup>4</sup> /<br><i>PSRC1</i> <sup>2,3,4,5</sup> | <i>APOB</i> <sup>4,5</sup> | <i>APOB</i> <sup>5</sup> | <i>APOB</i> <sup>1,4</sup> | <i>GCKR1</i> <sup>1,4</sup> | <i>LPL</i> <sup>1,4,5</sup> /<br><i>SLC18A1</i> <sup>4</sup> | <i>LPL</i> <sup>4</sup> | <i>LPL</i> <sup>4,5</sup> | <i>HBG2</i> <sup>1</sup> /<br><i>HBE1</i> <sup>1</sup> | <i>APOA5</i> <sup>4</sup> /<br><i>A4</i> <sup>4</sup> / <i>C3</i> <sup>4</sup> / <i>A1</i> <sup>1</sup> /<br><i>ZNF259</i> <sup>2,3</sup> | <i>LIPC</i> <sup>4</sup> | <i>ALDH1A2</i> <sup>1</sup> | <i>LIPC</i> <sup>1,3,4</sup> | <i>CEPT</i> <sup>5</sup> | <i>MEF2B</i> <sup>1,5</sup> | <i>APOE</i> <sup>4</sup> / <i>C1</i> <sup>3,4</sup> /<br><i>C2</i> <sup>4</sup> / <i>C4</i> <sup>4</sup> |        |
|-------------|--------------|-------------------|-----------------------------|------------------------------------------------------------------------------------------------|----------------------------|--------------------------|----------------------------|-----------------------------|--------------------------------------------------------------|-------------------------|---------------------------|--------------------------------------------------------|-------------------------------------------------------------------------------------------------------------------------------------------|--------------------------|-----------------------------|------------------------------|--------------------------|-----------------------------|----------------------------------------------------------------------------------------------------------|--------|
|             |              |                   |                             | <i>rs629301</i>                                                                                | <i>rs11902417</i>          | <i>rs13392272</i>        | <i>rs1469513</i>           | <i>rs780094</i>             | <i>rs326</i>                                                 | <i>rs17410962</i>       | <i>rs17489268</i>         | <i>rs11036635</i>                                      | <i>rs964184</i>                                                                                                                           | <i>rs4775041</i>         | <i>rs261332</i>             | <i>rs247617</i>              | <i>rs7360000</i>         | <i>rs2927439</i>            | <i>rs4420638</i>                                                                                         |        |
|             |              |                   |                             | Chr. 1<br>109,818,306                                                                          | Chr. 2<br>21,198,900       | Chr. 2<br>21,217,490     | Chr. 2<br>21,259,562       | Chr. 2<br>27,741,237        | Chr. 8<br>19,819,439                                         | Chr. 8<br>19,848,080    | Chr. 8<br>19,852,045      | Chr. 11<br>5,308,896                                   | Chr. 11<br>116,648,917                                                                                                                    | Chr. 15<br>58,674,695    | Chr. 15<br>58,727,325       | Chr. 16<br>56,990,716        | Chr. 19<br>19,266,848    | Chr. 19<br>45,242,740       | Chr. 19<br>45,422,946                                                                                    |        |
| TREE I      | TG           | 0.259             | 0.643                       |                                                                                                |                            |                          |                            | 5.409                       | 0.001                                                        |                         | 2.353                     | 1.868                                                  | 17.660                                                                                                                                    |                          |                             |                              |                          |                             |                                                                                                          |        |
|             | LDL          | 0.347             | 0.454                       |                                                                                                |                            |                          |                            |                             |                                                              |                         |                           |                                                        |                                                                                                                                           |                          |                             |                              |                          |                             | 0.001                                                                                                    |        |
|             | APOB         | 0.382             | 0.573                       |                                                                                                |                            | 0.001                    | 2.268                      |                             |                                                              |                         |                           |                                                        |                                                                                                                                           |                          |                             |                              |                          |                             | 3.195                                                                                                    | 17.349 |
|             | TG-LDL       | 0.257             | 0.582                       |                                                                                                |                            |                          | 0.766                      | 17.924                      | 0.001                                                        |                         | 2.388                     | 0.044                                                  | 17.924                                                                                                                                    |                          |                             |                              |                          |                             |                                                                                                          | 0.697  |
|             | TG-APOB      | 0.264             | 0.525                       | 3.638                                                                                          |                            | 0.001                    | 4.679                      | 6.366                       | 1.201                                                        |                         | 3.704                     | 1.388                                                  | 18.731                                                                                                                                    |                          |                             |                              |                          | 0.704                       | 5.890                                                                                                    | 18.731 |
|             | LDL-APOB     | 0.164             | 0.536                       |                                                                                                | 0.807                      | 0.001                    | 2.659                      | 1.821                       |                                                              |                         |                           |                                                        |                                                                                                                                           | 5.828                    |                             |                              |                          |                             | 2.160                                                                                                    | 18.253 |
| TG-LDL-APOB | 0.314        | 0.692             | 3.397                       |                                                                                                |                            | 2.206                    | 6.869                      | 0.001                       |                                                              | 2.201                   |                           |                                                        | 17.950                                                                                                                                    |                          |                             |                              |                          | 5.643                       | 17.950                                                                                                   |        |
| TREE II     | TG           | 0.259             | 0.643                       |                                                                                                |                            |                          |                            | 5.409                       | 0.001                                                        |                         | 2.353                     | 1.868                                                  | 17.660                                                                                                                                    |                          |                             |                              |                          |                             |                                                                                                          |        |
|             | HDL          | 0.214             | 0.494                       |                                                                                                |                            |                          |                            |                             | 1.734                                                        |                         | 0.000                     |                                                        |                                                                                                                                           |                          |                             | 1.472                        |                          | 17.375                      |                                                                                                          |        |
|             | APOA1        | 0.583             | 0.651                       |                                                                                                |                            |                          |                            |                             |                                                              |                         |                           |                                                        |                                                                                                                                           | 12.136                   |                             |                              | 12.136                   |                             |                                                                                                          |        |
|             | TG-HDL       | 0.140             | 0.550                       |                                                                                                |                            |                          |                            | 6.997                       | 2.689                                                        | 0.001                   | 2.478                     | 1.706                                                  | 18.722                                                                                                                                    | 5.772                    | 2.704                       | 18.722                       |                          |                             |                                                                                                          | 0.519  |
|             | TG-APOA1     | 0.185             | 0.673                       |                                                                                                |                            |                          |                            | 6.366                       |                                                              |                         | 17.158                    | 1.297                                                  | 17.158                                                                                                                                    | 6.386                    | 0.001                       | 3.948                        |                          |                             |                                                                                                          | 1.009  |
|             | HDL-APOA1    | 0.402             | 0.763                       |                                                                                                |                            |                          |                            |                             | 1.799                                                        | 0.001                   | 0.840                     |                                                        | 4.771                                                                                                                                     | 18.510                   |                             | 18.510                       |                          |                             |                                                                                                          |        |
|             | TG-HDL-APOA1 | 0.295             | 0.678                       |                                                                                                |                            |                          |                            | 3.781                       | 1.752                                                        |                         | 2.690                     | 0.618                                                  | 18.365                                                                                                                                    | 18.365                   | 0.389                       | 18.365                       |                          |                             |                                                                                                          |        |
| TG-HDL-LDL  | 0.314        | 0.757             |                             |                                                                                                |                            | 0.001                    | 17.868                     | 1.734                       |                                                              | 2.142                   |                           |                                                        | 17.868                                                                                                                                    | 5.281                    | 2.414                       | 17.868                       |                          |                             | 6.560                                                                                                    |        |
