# Supplementary material for: GUESS-ing Polygenic Associations with Multiple Phenotypes Using a GPU-Based Evolutionary Stochastic Search Algorithm
Source: PubMed Central journal article supplement (PMC3738451; doi:10.1371/journal.pgen.1003657), 2013-08-08
Supplement: pgen.1003657.s015.pdf [file pgen.1003657.s015.pdf]

|                                                           | <b>GUESS</b>                                                                   | <b>SNPTEST</b>                                                        | <b>piMASS</b>                                          |
|-----------------------------------------------------------|--------------------------------------------------------------------------------|-----------------------------------------------------------------------|--------------------------------------------------------|
| <b>Sparsity prior</b>                                     | Binomial prior with hyper-prior $\pi$                                          | Bernoulli prior<br>Probability $\pi$ fixed at $10^{-4}$               | Bernoulli prior with hyper-prior $\pi$                 |
| <b>Hyper-prior on <math>\pi</math></b>                    | Beta prior<br>User can specify hyper-parameters                                | No                                                                    | Log-Uniform prior<br>User can specify hyper-parameters |
| <b>Prior on error variance</b>                            | InvGamma/<br>InvWishart prior.<br>Conjugate with the effects variance          | InvGamma/<br>InvWishart prior.<br>Conjugate with the effects variance | InvGamma prior.<br>Conjugate with the effects variance |
| <b>Hyper-parameters on prior error variance</b>           | Diffuse prior specified.<br>For InvWishart automatic empirical Bayes estimates | Diffuse prior specified                                               | Diffuse prior specified                                |
| <b>Prior on regression coefficients</b>                   | Normal/Matrix normal $g$ -prior                                                | Normal/Matrix normal independent prior                                | Normal independent prior                               |
| <b>Prior on effects variance</b>                          | InvGamma/<br>InvWishart prior                                                  | InvGamma/<br>InvWishart prior                                         | InvGamma prior                                         |
| <b>Hyper-prior on variance of regression coefficients</b> | InvGamma prior (with no existing moments and heavy tails)                      | No                                                                    | Special form (heavy tails)                             |
