# Supplementary material for: GUESS-ing Polygenic Associations with Multiple Phenotypes Using a GPU-Based Evolutionary Stochastic Search Algorithm
Source: PubMed Central journal article supplement (PMC3738451; doi:10.1371/journal.pgen.1003657), 2013-08-08
Supplement: pgen.1003657.s016.pdf [file pgen.1003657.s016.pdf]

| Groups of traits    | GUESS            |                    |                         |                                 |                              | piMASS           |                         |                                 |                              |
|---------------------|------------------|--------------------|-------------------------|---------------------------------|------------------------------|------------------|-------------------------|---------------------------------|------------------------------|
|                     | Comp. time hours | # models evaluated | # unique models visited | # models visited before top BMV | Average (and std) model size | Comp. time hours | # unique models visited | # models visited before top BMV | Average (and std) model size |
| <b>APOA1</b>        | 255              | 33,421,374         | 47,285                  | 363                             | 3.86 (1.51)                  | 632              | 519,662                 | 775,127                         | 12.43 (12.47)                |
| <b>APOB</b>         | 283              | 36,174,089         | 53,492                  | 5,746                           | 6.22 (2.31)                  | 635              | 619,055                 | 395,125                         | 21.54 (15.04)                |
| <b>HDL</b>          | 261              | 34,054,212         | 49,188                  | 2,957                           | 3.89 (1.94)                  | 643              | 598,881                 | 250,669                         | 20.48 (14.44)                |
| <b>LDL</b>          | 194              | 34,316,607         | 46,587                  | 1,915                           | 2.62 (1.84)                  | 625              | 682,042                 | 145,260                         | 19.03 (16.92)                |
| <b>TG</b>           | 265              | 34,718,263         | 52,205                  | 1,771                           | 5.74 (1.81)                  | 675              | 624,890                 | 151,931                         | 10.41 (7.84)                 |
| <b>HDL-APOA1</b>    | 201              | 34,146,989         | 18,496                  | 86                              | 4.17 (1.02)                  | -                | -                       | -                               | -                            |
| <b>LDL-APOB</b>     | 268              | 34,213,582         | 25,778                  | 611,784                         | 4.41 (1.32)                  | -                | -                       | -                               | -                            |
| <b>TG-APOA1</b>     | 212              | 34,504,619         | 27,395                  | 9,440                           | 6.96 (1.24)                  | -                | -                       | -                               | -                            |
| <b>TG-APOB</b>      | 208              | 34,209,888         | 32,021                  | 6,949                           | 7.63 (1.35)                  | -                | -                       | -                               | -                            |
| <b>TG-HDL</b>       | 282              | 34,284,477         | 26,260                  | 14,876                          | 6.77 (1.32)                  | -                | -                       | -                               | -                            |
| <b>TG-LDL</b>       | 265              | 33,559,719         | 22,067                  | 298,405                         | 4.07 (1.33)                  | -                | -                       | -                               | -                            |
| <b>TG-HDL-APOA1</b> | 233              | 33,723,713         | 8,237                   | 309                             | 5.38 (0.90)                  | -                | -                       | -                               | --                           |
| <b>TG-HDL-LDL</b>   | 196              | 34,054,533         | 9,729                   | 207                             | 7.02 (0.89)                  | -                | -                       | -                               | -                            |
| <b>TG-LDL-APOB</b>  | 201              | 33,376,005         | 9,636                   | 290                             | 6.21 (1.09)                  | -                | -                       | -                               | -                            |
