# Supplementary material for: GUESS-ing Polygenic Associations with Multiple Phenotypes Using a GPU-Based Evolutionary Stochastic Search Algorithm
Source: PubMed Central journal article supplement (PMC3738451; doi:10.1371/journal.pgen.1003657), 2013-08-08
Supplement: pgen.1003657.s017.pdf [file pgen.1003657.s017.pdf]

|              | <i>SORT1</i> <sup>4</sup> /<br><i>CELSR2</i> <sup>4</sup> /<br><i>PSRC1</i> <sup>2,3,4,5</sup> | <i>APOB</i> <sup>4,5</sup> | <i>APOB</i> <sup>5</sup> | <i>APOB</i> <sup>1,4</sup> | <i>GCKR1</i> <sup>1,4</sup> | <i>LPL</i> <sup>1,4,5</sup> /<br><i>SLC18A1</i> <sup>4</sup> | <i>LPL</i> <sup>4</sup> | <i>LPL</i> <sup>4,5</sup> | <i>HBG2</i> <sup>1</sup> /<br><i>HBE1</i> <sup>1</sup> | <i>APOA5</i> <sup>4</sup> /<br><i>A4</i> <sup>4</sup> / <i>C3</i> <sup>4</sup> / <i>A1</i> <sup>1</sup> /<br><i>ZNF259</i> <sup>2,3</sup> | <i>LIPC</i> <sup>4</sup> | <i>ALDH1A2</i> <sup>1</sup> | <i>LIPC</i> <sup>1,3,4</sup> | <i>CEPT</i> <sup>5</sup> | <i>MEF2B</i> <sup>1,5</sup> | <i>APOE</i> <sup>4</sup> / <i>C1</i> <sup>3,4</sup> /<br><i>C2</i> <sup>4</sup> / <i>C4</i> <sup>4</sup> |        |
|--------------|------------------------------------------------------------------------------------------------|----------------------------|--------------------------|----------------------------|-----------------------------|--------------------------------------------------------------|-------------------------|---------------------------|--------------------------------------------------------|-------------------------------------------------------------------------------------------------------------------------------------------|--------------------------|-----------------------------|------------------------------|--------------------------|-----------------------------|----------------------------------------------------------------------------------------------------------|--------|
|              | <i>rs629301</i>                                                                                | <i>rs11902417</i>          | <i>rs13392272</i>        | <i>rs1469513</i>           | <i>rs780094</i>             | <i>rs326</i>                                                 | <i>rs17410962</i>       | <i>rs17489268</i>         | <i>rs11036635</i>                                      | <i>rs964184</i>                                                                                                                           | <i>rs4775041</i>         | <i>rs261332</i>             | <i>rs247617</i>              | <i>rs7360000</i>         | <i>rs2927439</i>            | <i>rs4420638</i>                                                                                         |        |
|              | Chr. 1<br>109,818,306                                                                          | Chr. 2<br>21,198,900       | Chr. 2<br>21,217,490     | Chr. 2<br>21,259,562       | Chr. 2<br>27,741,237        | Chr. 8<br>19,819,439                                         | Chr. 8<br>19,848,080    | Chr. 8<br>19,852,045      | Chr. 11<br>5,308,896                                   | Chr. 11<br>116,648,917                                                                                                                    | Chr. 15<br>58,674,695    | Chr. 15<br>58,727,325       | Chr. 16<br>56,990,716        | Chr. 19<br>19,266,848    | Chr. 19<br>45,242,740       | Chr. 19<br>45,422,946                                                                                    |        |
| TREE I       | TG                                                                                             |                            |                          |                            | 6.654                       | 4.231                                                        |                         | 5.018                     | 4.844                                                  | 15.891                                                                                                                                    |                          |                             |                              |                          |                             |                                                                                                          |        |
|              | LDL                                                                                            |                            |                          |                            |                             |                                                              |                         |                           |                                                        |                                                                                                                                           |                          |                             |                              |                          |                             | 4.259                                                                                                    |        |
|              | APOB                                                                                           |                            |                          | 4.059                      | 4.992                       |                                                              |                         |                           |                                                        |                                                                                                                                           |                          |                             |                              |                          |                             | 7.370                                                                                                    | 10.740 |
|              | TG-LDL                                                                                         |                            |                          |                            | 4.191                       | 7.312                                                        | 3.876                   |                           | 4.958                                                  | 4.113                                                                                                                                     | 15.255                   |                             |                              |                          |                             |                                                                                                          | 4.075  |
|              | TG-APOB                                                                                        | 5.202                      |                          | 4.010                      | 4.931                       | 6.370                                                        | 3.625                   |                           | 4.580                                                  | 4.123                                                                                                                                     | 15.774                   |                             |                              |                          | 2.841                       | 8.373                                                                                                    | 10.169 |
| LDL-APOB     |                                                                                                | 3.988                      | 4.518                    | 4.518                      | 4.698                       |                                                              |                         | 6.622                     |                                                        | 6.622                                                                                                                                     |                          |                             |                              |                          |                             | 6.956                                                                                                    | 13.458 |
| TG-LDL-APOB  | 5.816                                                                                          |                            |                          | 3.884                      | 5.501                       | 3.348                                                        |                         | 4.449                     |                                                        | 15.858                                                                                                                                    |                          |                             |                              |                          |                             | 9.309                                                                                                    | 14.302 |
| TREE II      | TG                                                                                             |                            |                          |                            | 6.654                       | 4.231                                                        |                         | 5.018                     | 4.844                                                  | 15.891                                                                                                                                    |                          |                             |                              |                          |                             |                                                                                                          |        |
|              | HDL                                                                                            |                            |                          |                            |                             | 4.689                                                        |                         | 4.140                     |                                                        |                                                                                                                                           |                          |                             | 4.971                        |                          | 20.000                      |                                                                                                          |        |
|              | APOA1                                                                                          |                            |                          |                            |                             |                                                              |                         |                           |                                                        |                                                                                                                                           |                          | 8.043                       |                              | 13.435                   |                             |                                                                                                          |        |
|              | TG-HDL                                                                                         |                            |                          |                            | 6.345                       | 5.957                                                        | 5.274                   | 6.149                     | 4.876                                                  | 15.785                                                                                                                                    | 6.301                    | 3.734                       | 20.000                       |                          |                             |                                                                                                          | 3.332  |
|              | TG-APOA1                                                                                       |                            |                          |                            | 6.370                       |                                                              |                         | 5.988                     | 5.315                                                  | 6.469                                                                                                                                     | 8.110                    | 3.258                       | 12.696                       |                          |                             |                                                                                                          | 4.267  |
|              | HDL-APOA1                                                                                      |                            |                          |                            |                             | 4.128                                                        | 3.865                   | 3.699                     |                                                        | 3.388                                                                                                                                     | 7.548                    |                             | 20.000                       |                          |                             |                                                                                                          |        |
| TG-HDL-APOA1 |                                                                                                |                            |                          |                            | 5.725                       | 5.267                                                        |                         | 5.471                     | 4.660                                                  | 15.317                                                                                                                                    | 7.401                    | 3.096                       | 20.000                       |                          |                             |                                                                                                          |        |
| TG-HDL-LDL   |                                                                                                |                            |                          | 3.464                      | 7.397                       | 5.338                                                        |                         | 5.759                     |                                                        | 15.205                                                                                                                                    | 6.437                    | 3.893                       | 20.000                       |                          |                             |                                                                                                          | 6.998  |
