# Supplementary material for: GUESS-ing Polygenic Associations with Multiple Phenotypes Using a GPU-Based Evolutionary Stochastic Search Algorithm
Source: PubMed Central journal article supplement (PMC3738451; doi:10.1371/journal.pgen.1003657), 2013-08-08
Supplement: pgen.1003657.s018.pdf [file pgen.1003657.s018.pdf]

| Groups of traits                  | Tree centred on pathway | Sample size null distribution (# artificial data sets) | MPPI threshold at 5% FDR | log <sub>10</sub> (BF) threshold at 5% FDR | Significant SNPs called at 5% FDR |
|-----------------------------------|-------------------------|--------------------------------------------------------|--------------------------|--------------------------------------------|-----------------------------------|
| <b>APOA1<sup>+</sup></b>          | HDL                     | 4,099,410 (3x5)                                        | 0.1077                   | 3.192                                      | 2                                 |
| <b>APOB<sup>+</sup></b>           | LDL                     | 4,099,410 (3x5)                                        | 0.0577                   | 2.923                                      | 4                                 |
| <b>HDL<sup>+</sup></b>            | HDL                     | 4,099,410 (3x5)                                        | 0.0822                   | 3.088                                      | 4                                 |
| <b>LDL<sup>+</sup></b>            | LDL                     | 4,099,410 (3x5)                                        | 0.0632                   | 2.965                                      | 1                                 |
| <b>TG<sup>+</sup></b>             | HDL/LDL                 | 4,099,410 (3x5)                                        | 0.0291                   | 2.612                                      | 5                                 |
| <b>HDL-APOA1<sup>++</sup></b>     | HDL                     | 4,919,292 (3x6)                                        | 0.0042                   | 1.762                                      | 6                                 |
| <b>LDL-APOB<sup>++</sup></b>      | LDL                     | 4,919,292 (3x6)                                        | 0.0076                   | 2.019                                      | 7                                 |
| <b>TG-APOA1<sup>++</sup></b>      | HDL                     | 4,919,292 (3x6)                                        | 0.0868                   | 3.114                                      | 8                                 |
| <b>TG-APOB<sup>++</sup></b>       | LDL                     | 4,919,292 (3x6)                                        | 0.0025                   | 1.541                                      | 11                                |
| <b>TG-HDL<sup>++</sup></b>        | HDL                     | 4,919,292 (3x6)                                        | 0.0026                   | 1.550                                      | 10                                |
| <b>TG-LDL<sup>++</sup></b>        | LDL                     | 4,919,292 (3x6)                                        | 0.0160                   | 2.348                                      | 7                                 |
| <b>TG-HDL-APOA1<sup>+++</sup></b> | HDL                     | 2,459,646 (3x3)                                        | 0.0059                   | 1.960                                      | 9                                 |
| <b>TG-HDL-LDL<sup>+++</sup></b>   | -                       | 2,459,646 (3x3)                                        | 0.0182                   | 2.404                                      | 9                                 |
| <b>TG-LDL-APOB<sup>+++</sup></b>  | LDL                     | 2,459,646 (3x3)                                        | 0.0151                   | 2.322                                      | 8                                 |
