# Supplementary material for: GUESS-ing Polygenic Associations with Multiple Phenotypes Using a GPU-Based Evolutionary Stochastic Search Algorithm
Source: PubMed Central journal article supplement (PMC3738451; doi:10.1371/journal.pgen.1003657), 2013-08-08
Supplement: pgen.1003657.s019.pdf [file pgen.1003657.s019.pdf]

**A**

|         |                                                 | Region<br>around<br><i>rs629301</i><br>Chr. 1<br>109,818,306 | Region<br>around<br><i>rs261332</i><br>Chr. 15<br>58,727,325 |
|---------|-------------------------------------------------|--------------------------------------------------------------|--------------------------------------------------------------|
| TREE I  | TG<br>LDL<br>APOB                               |                                                              |                                                              |
|         | TG-LDL<br>TG-APOB<br>LDL-APOB                   | <b>rs629301</b><br>109,818,306                               |                                                              |
|         | TG-LDL-APOB                                     | <b>rs629301</b><br>109,818,306                               |                                                              |
| TREE II | TG<br>HDL<br>APOA1                              |                                                              |                                                              |
|         | TG-HDL<br>TG-APOA1<br>HDL-APOA1<br>TG-HDL-APOA1 |                                                              | <b>rs8034802</b><br>58,724,792                               |
|         | TG-HDL-LDL                                      |                                                              | <b>rs8034802</b><br>58,724,792                               |
|         |                                                 |                                                              |                                                              |

**B**

|         |                                                 | Region<br>around<br><i>rs629301</i><br>Chr. 1<br>109,818,306 | Region<br>around<br><i>rs261332</i><br>Chr. 15<br>58,727,325 |
|---------|-------------------------------------------------|--------------------------------------------------------------|--------------------------------------------------------------|
| TREE I  | TG<br>LDL<br>APOB                               |                                                              |                                                              |
|         | TG-LDL<br>TG-APOB<br>LDL-APOB                   | <b>rs629301</b><br>109,818,306                               |                                                              |
|         | TG-LDL-APOB                                     | <b>rs629301</b><br>109,818,306                               |                                                              |
| TREE II | TG<br>HDL<br>APOA1                              |                                                              |                                                              |
|         | TG-HDL<br>TG-APOA1<br>HDL-APOA1<br>TG-HDL-APOA1 |                                                              | <b>rs1077834</b><br>58,723,479                               |
|         | TG-HDL-LDL                                      |                                                              | <b>rs1077834</b><br>58,723,479                               |
|         |                                                 |                                                              |                                                              |
