# Supplementary material for: GUESS-ing Polygenic Associations with Multiple Phenotypes Using a GPU-Based Evolutionary Stochastic Search Algorithm
Source: PubMed Central journal article supplement (PMC3738451; doi:10.1371/journal.pgen.1003657), 2013-08-08
Supplement: pgen.1003657.s020.pdf [file pgen.1003657.s020.pdf]

**A**

rs629301  
Chr. 1  
109,818,306

rs8034802  
Chr. 15  
58,724,792

|         | rs629301     | rs8034802     |
|---------|--------------|---------------|
| TREE I  | TG           | -             |
|         | LDL          | 7.786         |
|         | APOB         | 9.272         |
|         | TG-LDL       | 6.653         |
|         | TG-APOB      | <b>9.892</b>  |
|         | LDL-APOB     | 8.152         |
|         | TG-LDL-APOB  | <b>9.510</b>  |
| TREE II | TG           | -             |
|         | HDL          | 12.968        |
|         | APOA1        | 14.208        |
|         | TG-HDL       | <b>17.490</b> |
|         | TG-APOA1     | 12.018        |
|         | HDL-APOA1    | 12.386        |
|         | TG-HDL-APOA1 | 10.641        |
|         | TG-HDL-LDL   | <b>17.716</b> |

**B**

rs629301  
Chr. 1  
109,818,306

rs1077834  
Chr. 15  
58,723,479

|         | rs629301     | rs1077834     |
|---------|--------------|---------------|
| TREE I  | TG           | -             |
|         | LDL          | 5.660         |
|         | APOB         | 5.470         |
|         | TG-LDL       | 5.141         |
|         | TG-APOB      | <b>6.761</b>  |
|         | LDL-APOB     | 6.295         |
|         | TG-LDL-APOB  | <b>5.855</b>  |
| TREE II | TG           | -             |
|         | HDL          | 13.213        |
|         | APOA1        | 12.961        |
|         | TG-HDL       | <b>22.192</b> |
|         | TG-APOA1     | 16.977        |
|         | HDL-APOA1    | 13.183        |
|         | TG-HDL-APOA1 | 19.947        |
|         | TG-HDL-LDL   | <b>22.130</b> |
